# Supplementary material
Source: publisher site journal article supplement (https://www.dovepress.com/article/376474)
Supplement: Supplementary file 1 [file get_supplementary_file.php]

Supplementary Figures





**Figure S1 After treated with** Rapamycin or AZD8055, the PC-3/DTX cells were treated with different concentrations of docetaxel as indicated. 24h later, the viability was measured by CCK-8 assay. Data are presented as the mean ± standard deviation of independent experiments performed in triplicate. **P*<0.05, ***P*<0.01, ****P*<0.001 vs. control.
